# Supplementary material
Source: PubMed Central journal article supplement (PMC6692172)
Supplement: NIHMS1530422-supplement-Supplementary_Table_1.pdf [file NIHMS1530422-supplement-Supplementary_Table_1.pdf]

**Table S1:** Properties of the Conductance-Voltage (G-V) relationships of L-Anap-incorporated spHCN channels in comparison to the wild type

|                       | $V_{1/2}$ (mV)        | $V_s$ (mV)      | n |
|-----------------------|-----------------------|-----------------|---|
| <i>spHCN WT</i>       | $-58.0 \pm 0.8$       | $6.6 \pm 0.2$   | 8 |
| <i>spHCN S346Anap</i> | $-49.8 \pm 3.2^*$     | $7.9 \pm 0.8$   | 4 |
| <i>spHCN L348Anap</i> | $-65.1 \pm 2.6^*$     | $8.7 \pm 1.8$   | 4 |
| <i>spHCN S353Anap</i> | $-56.6 \pm 5.4$       | $7.6 \pm 0.6$   | 4 |
| <i>spHCN W355Anap</i> | $-65.0 \pm 2.3^*$     | $8.5 \pm 0.7^*$ | 6 |
| <i>spHCN F359Anap</i> | $< -100 \pm 1.0^{**}$ | n.d.            | 3 |
| <i>spHCN W218Anap</i> | $-60.9 \pm 2.6$       | $9.2 \pm 1.4^*$ | 3 |

Statistical Significance: \*  $p < 0.05$ , \*\*  $p < 0.001$  compared to the wild type using two-tailed t-test
